# Supplementary material for: Prevalence of polypharmacy and medication-related quality of life among adult patients in Al-Ahsa, Saudi Arabia
Source: PubMed Central journal article supplement (PMC10719800; doi:10.25122/jml-2023-0101), 2023-09
Supplement: JMedLife-16-1415-s001.pdf [file JMedLife-16-1415-s001.pdf]

## Questionnaire:

| Question                                                                                              | Response                                                                                                                                                                                                                                                                                                                                                                                                                                                                         |
|-------------------------------------------------------------------------------------------------------|----------------------------------------------------------------------------------------------------------------------------------------------------------------------------------------------------------------------------------------------------------------------------------------------------------------------------------------------------------------------------------------------------------------------------------------------------------------------------------|
| <b>Biographical data</b>                                                                              |                                                                                                                                                                                                                                                                                                                                                                                                                                                                                  |
| This questionnaire is intended for adult patient who take more than 3 medications aged above 18 years |                                                                                                                                                                                                                                                                                                                                                                                                                                                                                  |
| 1. Gender                                                                                             | <ul style="list-style-type: none"> <li>• Male</li> <li>• Female</li> </ul>                                                                                                                                                                                                                                                                                                                                                                                                       |
| 2. Age                                                                                                | <ul style="list-style-type: none"> <li>• -----</li> </ul>                                                                                                                                                                                                                                                                                                                                                                                                                        |
| 3. Level of education                                                                                 | <ul style="list-style-type: none"> <li>• Primary</li> <li>• Intermediate</li> <li>• Secondary</li> <li>• University and above</li> </ul>                                                                                                                                                                                                                                                                                                                                         |
| 4. Occupational status                                                                                | <ul style="list-style-type: none"> <li>• Employed</li> <li>• Unemployed</li> <li>• Housewife</li> <li>• Retired</li> <li>• (Other)</li> </ul>                                                                                                                                                                                                                                                                                                                                    |
| 5. Average monthly income "Saudi Riyal"                                                               | <ul style="list-style-type: none"> <li>• &gt; 10.000</li> <li>• 9999-7500</li> <li>• 7499-5000</li> <li>• 4999-2500</li> <li>• &lt;2500</li> <li>• Missing</li> </ul>                                                                                                                                                                                                                                                                                                            |
| 6. Marital status                                                                                     | <ul style="list-style-type: none"> <li>• Married</li> <li>• Polygamy</li> <li>• Single</li> <li>• Separated</li> <li>• Divorced</li> </ul>                                                                                                                                                                                                                                                                                                                                       |
| <b>Health condition</b>                                                                               |                                                                                                                                                                                                                                                                                                                                                                                                                                                                                  |
| 7. Do you have Chronic condition                                                                      | <ul style="list-style-type: none"> <li>• Hypertension</li> <li>• Diabetes</li> <li>• Asthma</li> <li>• Arthritis</li> <li>• Heart disease</li> <li>• Other</li> </ul>                                                                                                                                                                                                                                                                                                            |
| 8. Height                                                                                             | <ul style="list-style-type: none"> <li>• -----</li> </ul>                                                                                                                                                                                                                                                                                                                                                                                                                        |
| 9. Weight                                                                                             | <ul style="list-style-type: none"> <li>• -----</li> </ul>                                                                                                                                                                                                                                                                                                                                                                                                                        |
| 10. How many medications do you take?                                                                 | <ul style="list-style-type: none"> <li>• Less than five</li> <li>• Five and more</li> </ul>                                                                                                                                                                                                                                                                                                                                                                                      |
| 11. Do you take the medications regularly?                                                            | <ul style="list-style-type: none"> <li>• Yes "always on time"</li> <li>• Sometimes missed</li> <li>• No</li> </ul>                                                                                                                                                                                                                                                                                                                                                               |
| 12. Types of medication that you are used                                                             | <ul style="list-style-type: none"> <li>• Antidepressant</li> <li>• Antidiabetic</li> <li>• Heart medications</li> <li>• Psychiatric medications</li> <li>• Neurological medications</li> <li>• Eye medication</li> <li>• Pain killer</li> <li>• Asthma medication</li> <li>• Joint pain medication</li> <li>• Multivitamins</li> <li>• GI medication</li> <li>• Chronic lung medication</li> <li>• Antihyperlipidemia</li> <li>• ENT medication</li> <li>• Others ...</li> </ul> |

|                                                                                  |                                                                                                              |
|----------------------------------------------------------------------------------|--------------------------------------------------------------------------------------------------------------|
| 13. Is there any difficulty managing all these medication                        | <ul style="list-style-type: none"> <li>• Yes</li> <li>• Sometimes</li> <li>• Rarely</li> <li>• No</li> </ul> |
| 14. Did you develop any side effects from these medications                      | <ul style="list-style-type: none"> <li>• Yes</li> <li>• No</li> </ul>                                        |
| 15. If yes, write what side effects did you experience                           | • -----                                                                                                      |
| <b>Medication - Related Quality of life</b>                                      |                                                                                                              |
| Role limitations due to medication                                               |                                                                                                              |
| 1. Cut down the amount of time you spent on work or daily activities             | <ul style="list-style-type: none"> <li>• Always</li> <li>• Sometimes</li> <li>• Never</li> </ul>             |
| 2. Accomplish the work less than you would like                                  | <ul style="list-style-type: none"> <li>• Always</li> <li>• Sometimes</li> <li>• Never</li> </ul>             |
| 3. Were limited in the work or other daily activities                            | <ul style="list-style-type: none"> <li>• Always</li> <li>• Sometimes</li> <li>• Never</li> </ul>             |
| 4. Took extra effort or had difficulty performing the work or daily activities   | <ul style="list-style-type: none"> <li>• Always</li> <li>• Sometimes</li> <li>• Never</li> </ul>             |
| 5. Interfered with your social activities with family or friends                 | <ul style="list-style-type: none"> <li>• Always</li> <li>• Sometimes</li> <li>• Never</li> </ul>             |
| 6. Interfered with your recreational activities, such as exercise or watching TV | <ul style="list-style-type: none"> <li>• Always</li> <li>• Sometimes</li> <li>• Never</li> </ul>             |
| <b>Self-control</b>                                                              |                                                                                                              |
| 7. Felt frustrated or downhearted                                                | <ul style="list-style-type: none"> <li>• Always</li> <li>• Sometimes</li> <li>• Never</li> </ul>             |
| 8. Thought of yourself as a burden to others                                     | <ul style="list-style-type: none"> <li>• Always</li> <li>• Sometimes</li> <li>• Never</li> </ul>             |
| 9. Worried about disappointing others                                            | <ul style="list-style-type: none"> <li>• Always</li> <li>• Sometimes</li> <li>• Never</li> </ul>             |
| 10. Didn't do work or other activities as a result of medication problems        | <ul style="list-style-type: none"> <li>• Always</li> <li>• Sometimes</li> <li>• Never</li> </ul>             |
| 11. Reduced the number of days feeling full of pep                               | <ul style="list-style-type: none"> <li>• Always</li> <li>• Sometimes</li> <li>• Never</li> </ul>             |

All participants were asked to obtain consent before being involved in the study. The information was used only for scientific purposes.
